# Supplementary material for: Collective substitutions of selective rare earths (Yb3+, Dy3+, Tb3+, Gd3+, Eu3+, Nd3+) in ZrO2: an exciting prospect for biomedical applications
Source: Royal Society of Chemistry journal article supplement (doi:10.1039/c9dt01930h), 2019-01-01
Supplement: c9dt01930h1.pdf [file c9dt01930h1.pdf]

## Supporting Information

### Collective substitutions of selective rare earths ( $\text{Yb}^{3+}$ , $\text{Dy}^{3+}$ , $\text{Tb}^{3+}$ , $\text{Gd}^{3+}$ , $\text{Eu}^{3+}$ , $\text{Nd}^{3+}$ ) in $\text{ZrO}_2$ : An exciting prospect for biomedical applications.

S. Kalaivani and S. Kannan\*

*<sup>a</sup>Centre for Nanoscience and Technology,  
Pondicherry University, Puducherry-605 014, INDIA*

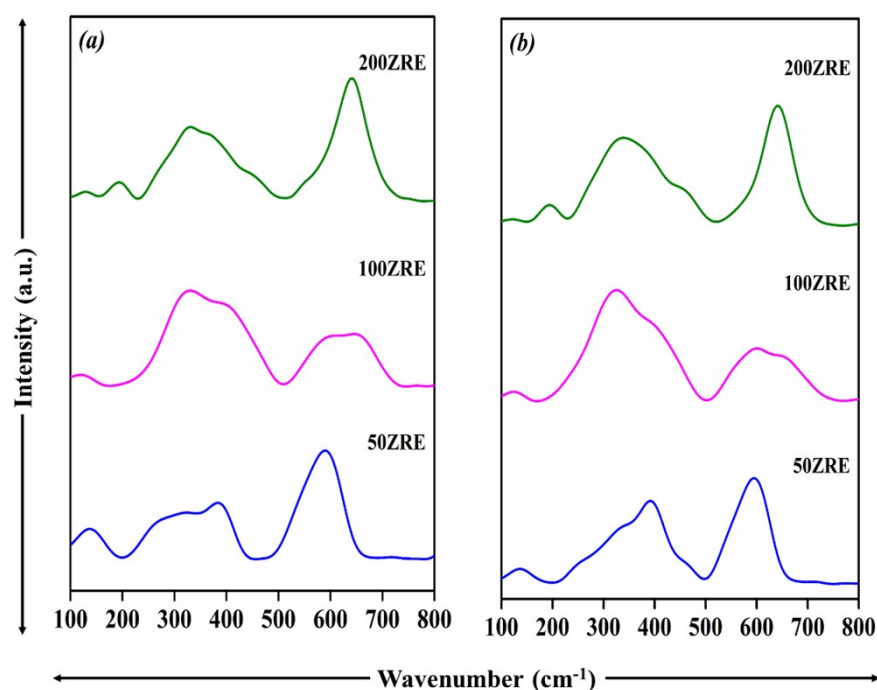

**Fig. S1** Raman spectra of multiple RE additions in  $\text{ZrO}_2$ . **Figs. S1a** and **b** represent the Raman spectra of the compositions recorded after heat treatment at 1400 and 1500 °C.

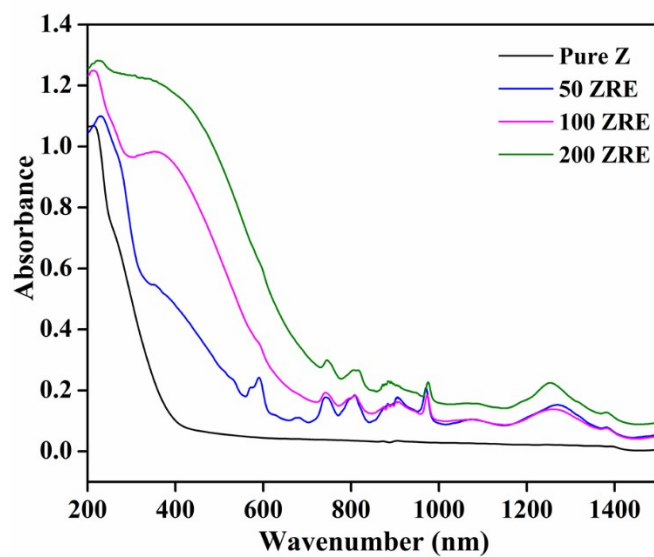

**Fig. S2** Absorption spectra of all the multiple RE additions in ZrO<sub>2</sub> compositions after heat treatment at 1500 °C.
